# Supplementary material
Source: publisher site journal article supplement (https://www.dovepress.com/article/289158)
Supplement: Supplementary file 1 [file get_supplementary_file.php]

**Table S1:** Correlation analysis of each gait and balance measurements and demographic characteristics in TIA/minor stroke

|  | | **Tandem** | **TUG** | **FSST** | **FRT** | **GPT** | **SLBT** |
| --- | --- | --- | --- | --- | --- | --- | --- |
| Age | r | -0.258 | 0.490 | 0.138 | -0.380 | 0.154 | -0.440 |
| p | **0.019** | **＜0.001** | 0.221 | **＜0.001** | 0.168 | **＜0.001** |
| Sex | r | -0.205 | 0.127 | -0.076 | -0.116 | 0.009 | -0.261 |
| p | 0.063 | 0.164 | 0.408 | 0.224 | 0.920 | **0.012** |
| BMI | r | 0.037 | 0.055 | -0.044 | -0.77 | 0.043 | 0.055 |
| p | 0.745 | 0.627 | 0.699 | 0.496 | 0.704 | 0.624 |
| Education years | r | 0.049 | 0.072 | 0.026 | -0.038 | -0.030 | 0.149 |
| p | 0.639 | 0.404 | 0.762 | 0.670 | 0.727 | 0.129 |
| Smoking | r | -0.184 | 0.095 | 0.004 | -0.024 | -0.010 | -0.168 |
| p | 0.095 | 0.298 | 0.962 | 0.797 | 0.914 | 0.107 |
| Drinking | r | -0.084 | 0.025 | -0.048 | 0.030 | 0.050 | -0.097 |
| p | 0.444 | 0.782 | 0.599 | 0.747 | 0.583 | 0.351 |
| Hypertension | r | 0.028 | -0.124 | 0.135 | 0.094 | -0.043 | 0.109 |
| p | 0.802 | 0.176 | 0.143 | 0.324 | 0.639 | 0.297 |
| Diabetes | r | 0.200 | -0.081 | -0.036 | 0.106 | 0.120 | 0.094 |
| p | 0.069 | 0.376 | 0.696 | 0.264 | 0.192 | 0.369 |
| Combined disease ≥3 kinds | r | 0.261 | -0.103 | 0.013 | 0.121 | 0.156 | 0.165 |
| p | 0.018 | 0.258 | 0.890 | 0.205 | 0.088 | 0.112 |
| Medication use  ≥4 kinds | r | 0.229 | -0.173 | -0.052 | 0.055 | 0.097 | 0.096 |
| p | 0.037 | 0.058 | 0.574 | 0.563 | 0.292 | 0.356 |
| Psychotropic drugs use | r | 0.149 | -0.103 | 0.084 | 0.112 | -0.025 | 0.197 |
| p | 0.174 | 0.258 | 0.361 | 0.240 | 0.788 | 0.058 |

**Note:** Boldfaced p values indicate significant findings (p < 0.05);

**Table S2:** Correlation analysis of each gait and balance measurements and clinical characteristics in TIA/minor stroke

|  | | **Tandem** | **TUG** | **FSST** | **FRT** | **GPT** | **SLBT** |
| --- | --- | --- | --- | --- | --- | --- | --- |
| Superior vision | r | 0.261 | -0.225 | -0.150 | 0.090 | 0.021 | 0.268 |
| p | **0.022** | **0.049** | 0.196 | 0.439 | 0.855 | **0.018** |
| Inferior vision | r | 0.370 | -.0215 | -0.160 | 0.147 | -0.002 | 0.237 |
| p | **0.001** | 0.061 | 0.167 | 0.206 | 0.987 | **0.038** |
| MMSE | r | 0.199 | -0.354 | -0.169 | 0.211 | -0.239 | 0.218 |
| p | **0.049** | **0.002** | 0.147 | 0.069 | **0.039** | **0.023** |
| MoCA | r | 0.078 | -0.264 | -0.245 | 0.058 | 0.018 | 0.115 |
| p | 0.447 | **0.029** | **0.044** | 0.638 | 0.882 | 0.239 |
| HADS | r | 0.069 | -0.065 | 0.047 | -0.001 | 0.038 | -0.027 |
| p | 0.475 | 0.573 | 0.686 | 0.994 | 0.738 | 0.767 |
| Intravenous thrombolysis | r | -0.245 | -0.019 | 0.029 | -0.183 | -0.214 | 0.357 |
| p | **0.028** | 0.867 | 0.800 | 0.106 | 0.057 | **0.001** |
| Localization of MRI | r | -0.086 | 0.076 | 0.020 | -0.196 | -0.001 | -0.089 |
| p | 0.530 | 0.579 | 0.881 | 0.152 | 0.993 | 0.516 |
| Localization of vascular events | r | -0.166 | -0.022 | -0.081 | -0.120 | 0.006 | -0.105 |
| p | 0.134 | 0.809 | 0.380 | 0.209 | 0.945 | 0.318 |
| FTSST | r | -0.095 | 0.580 | 0.461 | -0.207 | 0.259 | -0.127 |
| p | 0.293 | **＜0.001** | **＜0.001** | 0.064 | 0.019 | 0.140 |
| ABCD2 score | r | -0.419 | 0.359 | 0.020 | -0.245 | 0.080 | -0.122 |
| p | 0.081 | 0.078 | 0.922 | 0.250 | 0.695 | 0.604 |
| NIHSS score | r | 0.164 | -0.029 | -0.007 | -0.037 | -0.137 | 0.129 |
| p | 0.152 | 0.762 | 0.941 | 0.713 | 0.155 | 0.233 |

**Note:** Boldfaced p values indicate significant findings (p < 0.05); ABCD2 score and NIHSS score were respectively calculated with patients with TIA and minor stroke.

**Table S3:** Correlation analysis of each gait and balance measurements and laboratory [and vascular indexes](C:/Users/72445/AppData/Local/youdao/dict/Application/8.9.3.0/resultui/html/index.html#/javascript:;) in TIA/minor stroke

|  | | **Tandem** | **TUG** | **FSST** | **FRT** | **GPT** | **SLBT** |
| --- | --- | --- | --- | --- | --- | --- | --- |
| [Erythrocyte](C:/Users/72445/AppData/Local/youdao/dict/Application/8.9.3.0/resultui/html/index.html#/javascript:;) [sedimentation](C:/Users/72445/AppData/Local/youdao/dict/Application/8.9.3.0/resultui/html/index.html#/javascript:;) [rate](C:/Users/72445/AppData/Local/youdao/dict/Application/8.9.3.0/resultui/html/index.html#/javascript:;) (mm/h) | r | 0.223 | -0.071 | 0.048 | 0.013 | 0.023 | 0.080 |
| p | 0.051 | 0.538 | 0.679 | 0.908 | 0.841 | 0.486 |
| Leucocyte (*109/L) | r | 0.089 | -0.092 | -0.047 | 0.222 | 0.214 | -0.009 |
| p | 0.441 | 0.423 | 0.682 | 0.051 | 0.059 | 0.935 |
| Hemoglobin (g/L) | r | -0.028 | 0.000 | -0.116 | 0.206 | -0.022 | -0.092 |
| p | 0.806 | 0.997 | 0.317 | 0.070 | 0.847 | 0.425 |
| K-CRP (mg/L) | r | -0.212 | 0.038 | 0.401 | -0.168 | 0.045 | -0.061 |
| p | 0.222 | 0.830 | **0.017** | 0.335 | 0.797 | 0.728 |
| D-dimer (mg/L) | r | 0.038 | 0.010 | -0.022 | 0.047 | -0.153 | 0.055 |
| p | 0.749 | 0.935 | 0.854 | 0.688 | 0.192 | 0.644 |
| Fasting plasma glucose(mmol/L) | r | 0.110 | -0.037 | -0.043 | -0.003 | -0.054 | -0.149 |
| p | 0.341 | 0.750 | 0.715 | 0.981 | 0.642 | 0.196 |
| Glycated hemoglobin (%) | r | 0.105 | 0.089 | 0.090 | -0.031 | 0.011 | -0.002 |
| p | 0.369 | 0.448 | 0.444 | 0.794 | 0.928 | 0.985 |
| High density lipoprotein (mmol/L) | r | -0.059 | -0.034 | -0.022 | 0.077 | 0.015 | -0.020 |
| p | 0.613 | 0.774 | 0.854 | 0.516 | 0.895 | 0.862 |
| Low density lipoprotein  (mmol/L) | r | 0.074 | 0.107 | -0.106 | 0.058 | 0.180 | 0.265 |
| p | 0.674 | 0.542 | 0.544 | 0.743 | 0.300 | 0.123 |
| Uric acid (umol/L) | r | -0.171 | 0.133 | -0.013 | 0.040 | -0.026 | -0.009 |
| p | 0.143 | 0.256 | 0.914 | 0.732 | 0.825 | 0.942 |
| Homocysteine (umol/L) | r | -0.032 | -0.116 | -0.089 | 0.222 | -0.097 | -0.043 |
| p | 0.786 | 0.325 | 0.455 | 0.059 | 0.411 | 0.717 |
| Carotid arltery stenosis | r | -0.003 | 0.116 | -0.062 | -0.161 | -0.031 | 0.002 |
| p | 0.981 | 0.308 | 0.590 | 0.158 | 0.786 | 0.986 |
| Posterior circulation plaque | r | -0.121 | -0.073 | -0.070 | 0.121 | 0.199 | 0.103 |
| p | 0.288 | 0.520 | 0.541 | 0.293 | 0.079 | 0.365 |
| Aortic arch plaque | r | 0.106 | -0.027 | 0.174 | 0.130 | -0.034 | -0.088 |
| p | 0.365 | 0.819 | 0.137 | 0.268 | 0.772 | 0.453 |
| Atherosclerosis in lower limbs | r | -0.128 | -0.098 | -0.031 | -0.251 | 0.048 | -0.133 |
| p | 0.298 | 0.428 | 0.802 | **0.041** | 0.697 | 0.278 |

**Note:** Boldfaced p values indicate significant findings (p < 0.05);

**Table S4:** The data on the selected parameters in TIA/minor stroke

|  | **TIA/minor stroke** |
| --- | --- |
| [Erythrocyte](C:/Users/72445/AppData/Local/youdao/dict/Application/8.9.3.0/resultui/html/index.html#/javascript:;) [sedimentation](C:/Users/72445/AppData/Local/youdao/dict/Application/8.9.3.0/resultui/html/index.html#/javascript:;) [rate](C:/Users/72445/AppData/Local/youdao/dict/Application/8.9.3.0/resultui/html/index.html#/javascript:;) (mm/h) | 13.87 (15.77) |
| Leucocyte (*109/L) | 7.06 (2.10) |
| Hemoglobin (g/L) | 140.90 16.70 |
| K-CRP (mg/L) | 3.83 (8.58) |
| D-dimer (mg/L) | 0.53 (0.25) |
| Fasting plasma glucose (mmol/L) | 5.53 (2.19) |
| Glycated hemoglobin (%) | 6.92 (1.63) |
| High density lipoprotein (mmol/L) | 1.02 (0.24) |
| Low density lipoprotein (mmol/L) | 2.40 (0.93) |
| Uric acid (umol/L) | 308.78 (81.83) |
| Homocysteine (umol/L) | 16.13 (9.68) |
| Intravenous thrombolysis, Yes(%) | 21 (25.6%) |
| Localization of MRI, Yes(%) |  |
| Lobe | 17 (20.7%) |
| Paraventricular | 7 (8.5%) |
| Basal ganglia | 19 (23.2%) |
| Thalamus | 6 (7.3%) |
| Brainstem | 6 (7.3%) |
| Cerebellum | 1 (1.2%) |
| Localization of vascular events, Yes(%) |  |
| Anterior circulation | 45 (69.2%) |
| Posterior circulation | 20 (30.8%) |
| Carotid arltery stenosis, Yes(%) |  |
| Mild grade (＜50%) | 64 (78.0%) |
| Moderate (50%-69%) | 6 (7.3%) |
| High grade (70%-99%) | 9 (11.0%) |
| Posterior circulation plaque, Yes(%) | 61 (74.4%) |
| Aortic arch plaque, Yes(%) | 14 (17.1%) |
| Atherosclerosis in lower limbs, Yes(%) |  |
| Normal | 10 (12.2%) |
| Stenosis | 49 (59.8%) |
| Occlusion | 9 (11.0%) |

**Note:** Values are presented as mean (SD) or percentages. Percentages are based on total number of individuals for each group.
